# Supplementary material for: Unraveling the role of silicon in atmospheric aerosol secondary formation: A new conservative tracer for aerosol chemistry
Source: Copernicus journal article supplement (doi:10.5194/acp-2018-914), 2018-11-13
Supplement: Supplementary file [file Supplementary material (revised).pdf › Supplementary material (revised).pdf]

SUPPLEMENTARY INFORMATION

for

**Unraveling the role of silicon in atmospheric aerosol secondary  
formation: A new conservative tracer for aerosol chemistry**

Dawei Lu<sup>1</sup>, Jihua Tan<sup>2</sup>, Xuezhi Yang<sup>1,2</sup>, Xu Sun<sup>1</sup>, Qian Liu<sup>1,2,3,\*</sup>, Guibin Jiang<sup>1,2</sup>

<sup>1</sup>State Key Laboratory of Environmental Chemistry and Ecotoxicology, Research Center for  
Eco-Environmental Sciences, Chinese Academy of Sciences, Beijing 100085, China

<sup>2</sup>College of Resources and Environment, University of Chinese Academy of Sciences, Beijing  
100049, China

<sup>3</sup>Institute of Environment and Health, Jiangnan University, Wuhan 430056, China

Email: [qianliu@rcees.ac.cn](mailto:qianliu@rcees.ac.cn)

**Content**

1. Supplementary experimental details
2. Supporting figures
3. Supporting tables
4. References for SI

## **1. Supplementary experimental details**

### **1.1 Sampling of primary source samples of PM<sub>2.5</sub>**

For the primary sources of PM<sub>2.5</sub>, seven major sources were collected as literature reported (Ge et al., 2004; Li et al., 2011; Das et al., 2010; Zhao et al., 2006; Chow et al., 2003; Fraser et al., 1998; Hu et al., 2013; Huang et al., 2014; Zhang et al., 2013; Reff et al., 2009; Song et al., 2007; He et al., 2001), including soil dust, industrial emission, coal combustion, vehicle exhaust, biomass burning, urban fugitive dust, and construction dust. The soil dusts were collected at different directions and different depths around Beijing. The industrial emission samples were collected by air sleeves or electrostatic filters installed in the chimneys in steel and power plants in Tangshan, Hebei, which is adjacent to Beijing. The coal combustion samples were fly ashes from burning of honeycomb briquette and lump coals. The fly ashes were drawn through a dilution system (Ge et al., 2004) and then collected onto polypropylene membrane filters by an impactor at a flow rate of 36 L/min. The vehicle exhaust samples were collected following a previously reported method (Fraser et al., 1998) in the middle section of a highway tunnel (Tanyugou Tunnel, Changping, Beijing; 3455 m length) by a high-volume air sampler (Echo Hi-Vol, Milan, Italy) onto Whatman Teflon membrane filters. This tunnel is only open to motor vehicles (mainly diesel- and gasoline-powered vehicles) and the PM<sub>2.5</sub> concentration outside the tunnel was low ( $< 15 \mu\text{g}/\text{m}^3$ ), so the collected samples could represent the vehicle emission. The biomass burning samples were collected from burnt straws from Daxing and Tongzhou Districts, Beijing. The urban fugitive dusts were collected in the city of Beijing at an altitude of 20 m by an SYC-3 auto-sampler (Laoshan Instruments, Qingdao, China). The construction dusts were obtained from several construction sites in Beijing and mainly consisted of fine sands, cement dusts and brick dusts.

### **1.2 Measurement of Si isotopic composition**

The Si isotopic composition was measured by multi-collector inductively coupled plasma mass spectrometry (MC-ICP-MS) on a Nu Plasma II MC-ICP-MS (Wrexham, UK) working in medium-resolution mode coupled to a DSN-100 DeSolvation Nebulizer System. The samples were diluted with HCl solution to obtain a Si concentration of  $\sim 300 \text{ ng}/\text{mL}$ , at which the intensities of  $^{28}\text{Si}$ ,  $^{29}\text{Si}$  and  $^{30}\text{Si}$  were about 2, 0.11, and 0.08 V. A PFA nebulizer was used for sample injection at  $70 \mu\text{L}/\text{min}$  in dry mode. The optimized instrumental parameters and the Faraday cup configuration are the same as in our previous study (Lu et al., 2018). The procedure blank of the Faraday detector noise was subtracted in the electrostatic analyzer for

30 s prior to each measurement. After each measurement, the system was rinsed with HCl solution (pH 2) for 120 s to reduce the background intensity to < 0.03 V. Three parallel measurements were performed for all experiments ( $n = 3$ ). The Si isotopic composition was expressed as a  $\delta$  value ( $\delta^{30}\text{Si}$  and  $\delta^{29}\text{Si}$ ) relative to a standard material (NIST SRM-8546) as follows:

$$\delta^{29}\text{Si} = \left( \frac{(^{29}\text{Si}/^{28}\text{Si})_{\text{sample}}}{(^{29}\text{Si}/^{28}\text{Si})_{\text{standard}}} - 1 \right) \times 1000 \quad (\text{S1})$$

$$\delta^{30}\text{Si} = \left( \frac{(^{30}\text{Si}/^{28}\text{Si})_{\text{sample}}}{(^{30}\text{Si}/^{28}\text{Si})_{\text{standard}}} - 1 \right) \times 1000 \quad (\text{S2})$$

The mass bias of a sample was corrected by using a standard-sample-standard bracketing method based on the mean values of the isotope ratios from two adjacent standard measurements (Lu et al., 2016). Two standard reference materials (NIST SRM-8546 and IRMM-017) were used to validate the method. The  $\delta^{30}\text{Si}$  value of NIST SRM-8546 solution with a Si concentration of 300 ng/mL was measured to be  $-0.08 \pm 0.11\text{‰}$  (mean  $\pm$  2SD,  $n = 40$ ), and the  $\delta^{30}\text{Si}$  value of IRMM-017 was measured to be  $-1.38 \pm 0.18\text{‰}$  (mean  $\pm$  2SD,  $n = 36$ ). The  $\delta^{30}\text{Si}$  value of IRMM-017 was highly consistent with the literature reported value (Zambardi and Poitrasson, 2011), confirming the high accuracy and precision of the method.

### 1.3 Measurement of OC and EC in $\text{PM}_{2.5}$

OC and EC were measured by using a DRI Thermal/Optical Carbon Analyzer. The temperature program of the Interagency Monitoring of Protected Visual Environments (IMPROVE) thermal evolution protocol was adopted. A punch aliquot of a sample quartz filter was heated stepwise at temperatures of 120 °C (OC1), 250 °C (OC2), 450 °C (OC3), and 550 °C (OC4) in a non-oxidizing He atmosphere, and 550 °C (EC1) and 700 °C (EC2) in an oxidizing atmosphere of 2% oxygen in a balance of He. The carbon that evolved at each temperature was oxidized to  $\text{CO}_2$  and then reduced to methane ( $\text{CH}_4$ ) for quantification with a flame ionization detector. The analyzer was calibrated daily with  $\text{CH}_4$ . Quartz filter blanks were processed concurrently with field blank samples and used to obtain detection limits (LODs). The blank based LODs, calculated as three times the average field blanks, were  $< 1.0 \mu\text{g}/\text{m}^3$  for both OC and EC. Replicate analyses were performed at the rate of one per group of 10 samples. The RSDs were less than 5% (Cao et al., 2003). A detailed description of the uncertainties associated with the OC/EC measurements is given in a previous report (Viana et al., 2006).

### 1.4 Estimation of SOC in $\text{PM}_{2.5}$

It has been reported that the minimum value of OC/EC occurred simultaneously in urban and rural areas both in winter and summer (Castro et al., 1999), and particles with the minimum OC/EC ratios were regarded as being dominated by primary aerosols. Thus, the minimum value of OC/EC ratio can be used to estimate the amount of SOC in aerosols and the concentration of SOC can be calculated by the following equation:

$$\text{SOC} = \text{OC}_{\text{total}} - (\text{OC/EC})_{\text{min}} \times \text{EC} \quad (\text{S9})$$

where  $\text{OC}_{\text{total}}$  is the total OC, and  $(\text{OC/EC})_{\text{min}}$  is the estimated minimum OC/EC ratio (Turpin and Huntzicker, 1995).

### 1.5 Measurement of water soluble inorganic ions in PM<sub>2.5</sub>

The water-soluble inorganic ions were analyzed according to previously reported methods (Tan et al., 2009a; Tan et al., 2009b). The PM<sub>2.5</sub> filter samples were extracted by an ultrasonication method, and normally > 98% of sulfate, nitrate, and ammonium could be extracted. The filter was submerged in a vial with 10 mL of water, sealed and subjected to ultrasonication for 20 min. The extraction was repeated twice. The extracts were filtered through a 0.45 µm Teflon filter and then analyzed by ion chromatography (Dionex ICS 600 and 2100) to determine the concentrations of water soluble inorganic ions. The concentrations of the water-soluble inorganic ions in the field blanks were 0.22, 0.11, not detected (nd), 0.22, nd, 0.30, nd, 0.36, and 0.19 µg m<sup>-3</sup> for F<sup>-</sup>, Cl<sup>-</sup>, NO<sub>3</sub><sup>-</sup>, SO<sub>4</sub><sup>2-</sup>, NH<sub>4</sub><sup>+</sup>, Na<sup>+</sup>, K<sup>+</sup>, Ca<sup>2+</sup>, and Mg<sup>2+</sup>, respectively. The recoveries for the ions were in the range of 80%-120%. The relative standard deviation (RSD) of each ion was less than 6% in the reproducibility test. Blank values were subtracted from the sample measurements. Specifically, the uncertainties were 4%, 4%, and 5% for SO<sub>4</sub><sup>2-</sup>, NH<sub>4</sub><sup>+</sup>, and NO<sub>3</sub><sup>-</sup>, respectively.

### 1.6 Estimation of secondary aerosols by using the traditional method

Following the traditional method, the secondary aerosol (SA) contribution was estimated by the combination of SIA and SOA. The SIA was the sum of secondary ions (NH<sub>4</sub><sup>+</sup>, NO<sub>3</sub><sup>-</sup>, and SO<sub>4</sub><sup>2-</sup>), and the SOA was obtained by multiplying SOC by an OM/OC ratio of 1.6 (Xing et al., 2013).

### 1.7 Analysis of atmospheric concentration of SO<sub>2</sub> and NO<sub>x</sub> and relative humidity

The atmospheric concentrations of SO<sub>2</sub> and NO<sub>x</sub> were monitored by a Thermo Scientific Model 43i Sulfur Dioxide Analyzer and a Thermo Scientific Model 42i NO-NO<sub>2</sub>-NO<sub>x</sub> Analyzer, respectively. The relative humidity (RH) was measured by a Vaisala HUMICAP Humidity and Temperature Probe HMP155 (Helsinki, Finland).

## 2. Supporting figures

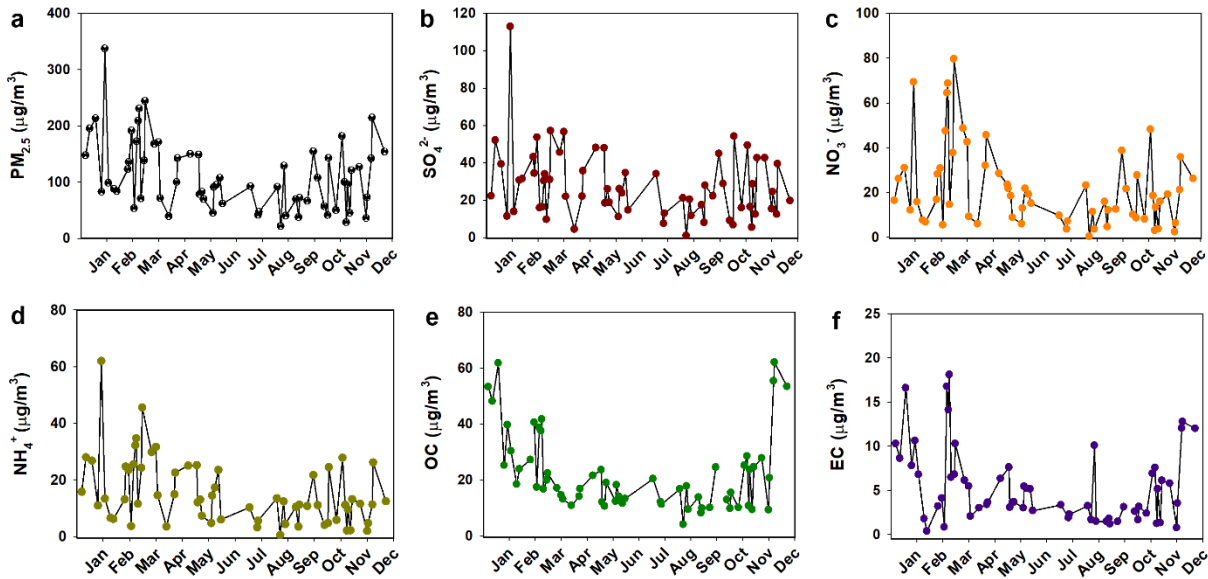

**Figure S1.** Daily concentration profile of PM<sub>2.5</sub> (a) and secondary species in PM<sub>2.5</sub> (SO<sub>4</sub><sup>2-</sup> (b), NO<sub>3</sub><sup>-</sup> (c), NH<sub>4</sub><sup>+</sup> (d), OC (e), and EC (f)) on haze days in 2013. The PM<sub>2.5</sub> samples were collected around Beijing on haze days in 2013 (see the Sect. 2.2 in the paper) (Lu et al., 2018). From (a), the PM<sub>2.5</sub> concentration showed large variations among different days ranging from 28.4 to 337.1 µg/m<sup>3</sup> with an annual mean value of 112.4 µg/m<sup>3</sup>. The pollution level in spring and winter was higher than that in summer and autumn probably due to the larger emission of coal combustion in spring and winter in this region (Lu et al., 2018; Liu et al., 2016). From (b)-(f), all secondary species in PM<sub>2.5</sub> showed a similar seasonal trend with the PM<sub>2.5</sub> (i.e., higher in spring/winter than in summer/autumn), because secondary aerosols are a major component of PM<sub>2.5</sub> in Beijing (Huang et al., 2014). While for individual days, the concentrations of different secondary species showed large differences, suggesting different sources and secondary particle contribution to PM<sub>2.5</sub> on different haze days.

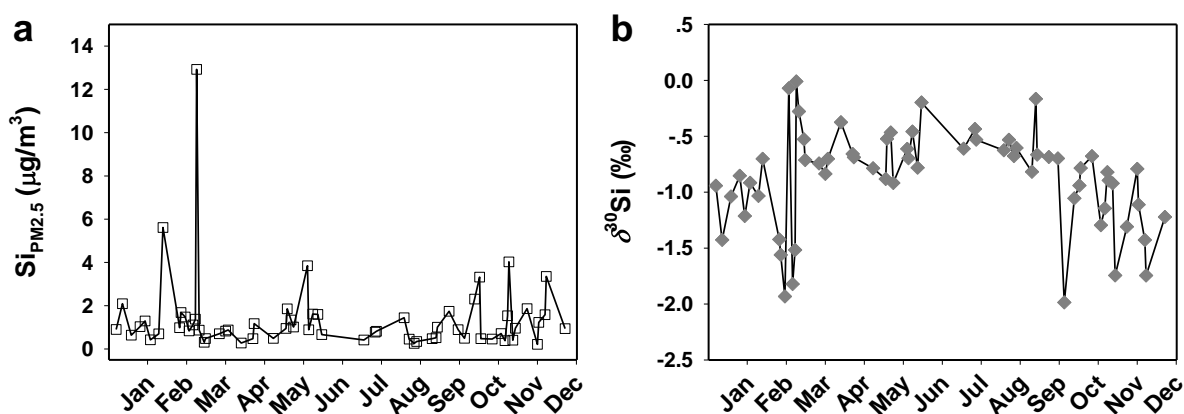

**Figure S2.** The daily mean  $\text{Si}_{\text{PM}_{2.5}}$  (a) and Si isotopic composition ( $\delta^{30}\text{Si}$ ) of  $\text{PM}_{2.5}$  (b) on different haze days in 2013. The sample information was the same as in Fig. S1. From (a), the  $\text{Si}_{\text{PM}_{2.5}}$  did not show any seasonal trend, which was totally different from the concentration profiles of  $\text{PM}_{2.5}$  and secondary species in  $\text{PM}_{2.5}$  (as shown in Fig. S1). However, for  $\delta^{30}\text{Si}$  of  $\text{PM}_{2.5}$  (b), a clear seasonal trend that more negative in spring/winter than in summer/autumn was observed. It should be noted that the Si isotopic signature could indicate the primary sources of  $\text{PM}_{2.5}$  (Lu et al., 2018). Thus, the results in (b) suggested that  $^{30}\text{Si}$ -depleted sources (e.g., coal combustion and industrial emission (Lu et al., 2018)) contributed more to aerosols in spring/winter than in summer/autumn. The discussion above evidenced that the airborne Si in  $\text{PM}_{2.5}$  was only related to the primary source emission but did not depend on the aerosol formation.

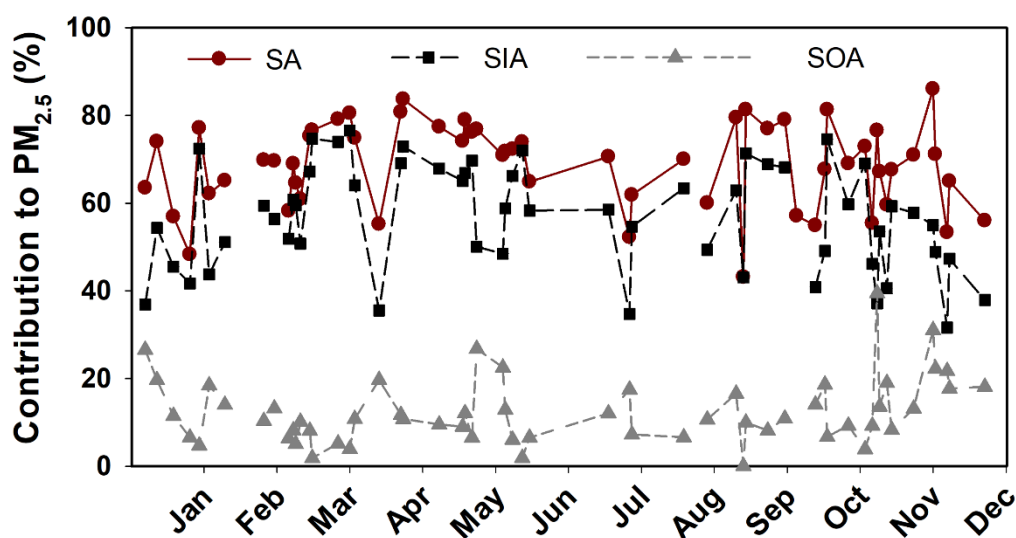

**Figure S3.** Contribution of secondary aerosol (SA), secondary inorganic aerosol (SIA), and secondary organic aerosol (SOA) to PM<sub>2.5</sub> estimated by using the traditional method. The contributions were estimated based on the chemical compositions of PM<sub>2.5</sub> (e.g., SO<sub>4</sub><sup>2-</sup>, NO<sub>3</sub><sup>-</sup>, NH<sub>4</sub><sup>+</sup>, OC, and EC). It can be seen that the SA contribution was quite high all through the year, and the contribution of SIA was much higher than that of SOA.

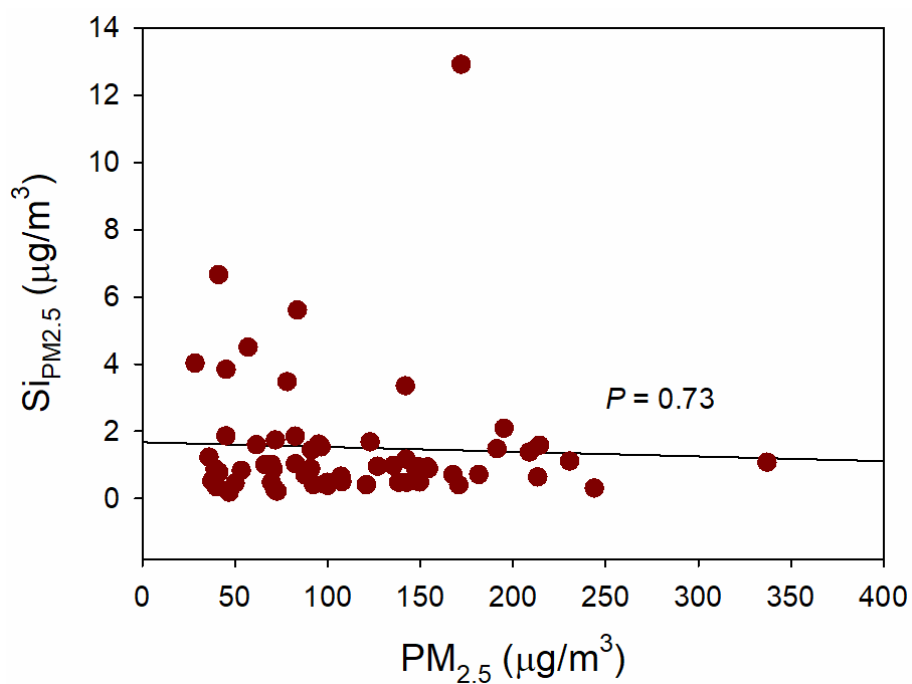

**Figure S4.** Correlation analysis of total Si in  $\text{PM}_{2.5}$  ( $\text{Si}_{\text{PM}_{2.5}}$ ) with  $\text{PM}_{2.5}$  concentration on haze days. The Si in  $\text{PM}_{2.5}$  did not show any correlation with the  $\text{PM}_{2.5}$  concentration ( $P = 0.73$ ). With the increase of  $\text{PM}_{2.5}$  concentration, the  $\text{Si}_{\text{PM}_{2.5}}$  was unaffected and kept a steady trend. Considering the high secondary aerosol contribution to  $\text{PM}_{2.5}$  in the studied region, this results also suggested that the airborne Si might not be involved in the secondary aerosol formation.



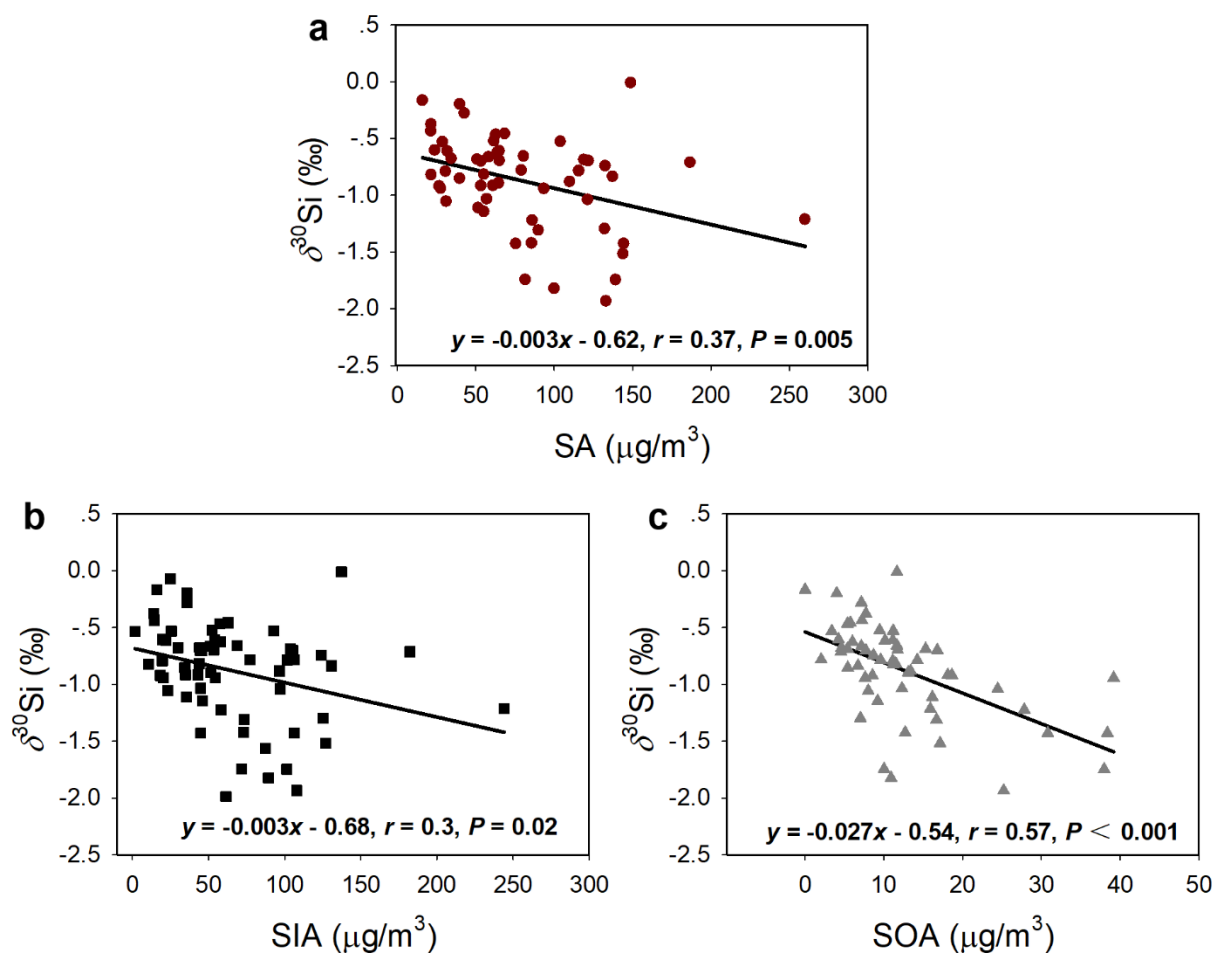

**Figure S5.** Correlation analysis of Si isotopic composition ( $\delta^{30}\text{Si}$ ) of  $\text{PM}_{2.5}$  with the secondary aerosols (SA (a), SIA (b), and SOA (c)).

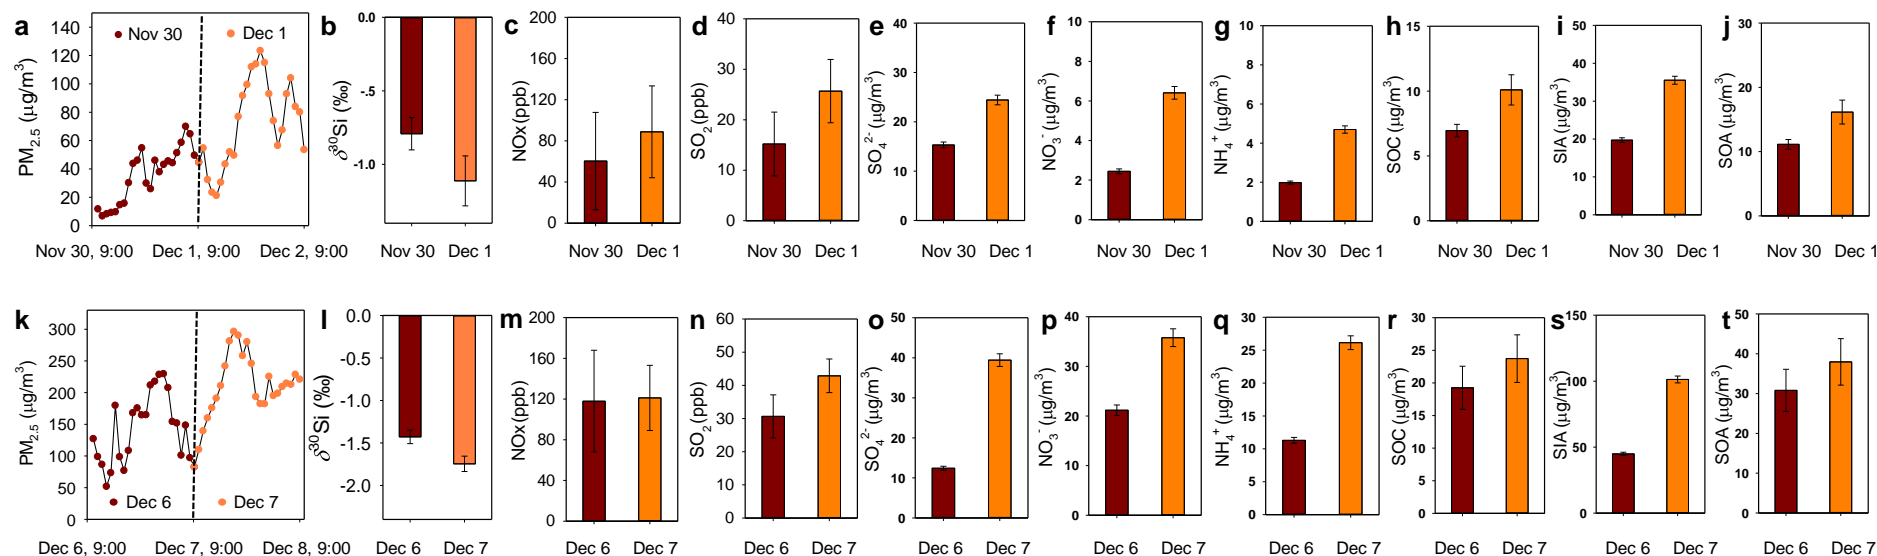

**Figure S6.** Variations of Si isotopic composition ( $\delta^{30}\text{Si}$ ) and multi-chemical species of secondary aerosols ( $\text{NO}_x$ ,  $\text{SO}_2$ ,  $\text{SO}_4^{2-}$ ,  $\text{NO}_3^-$ ,  $\text{NH}_4^+$ , SOC, SIA, and SOA) during two typical haze events. (a), Monitoring of  $\text{PM}_{2.5}$  concentration during Nov 30, 2013 to Dec 1, 2013. (b), Daily Si isotopic composition ( $\delta^{30}\text{Si}$ ) of  $\text{PM}_{2.5}$  in a. (c-d), Concentrations of precursor  $\text{NO}_x$  (c) and  $\text{SO}_2$  (d) of SA in a. (e-j), Concentrations of secondary species  $\text{SO}_4^{2-}$  (e),  $\text{NO}_3^-$  (f),  $\text{NH}_4^+$  (g), SOC (h), SIA (i), and SOA (j) of SA in a. The red and orange bars in (b-j) correspond to the days marked with the same colors in a. (k), Monitoring of  $\text{PM}_{2.5}$  concentrations during Dec 6, 2013 to Dec 7, 2013. (l), Daily  $\delta^{30}\text{Si}$  of  $\text{PM}_{2.5}$  in k. (m-n), Concentrations of precursor  $\text{NO}_x$  (m) and  $\text{SO}_2$  (n) of SA in k. (o-t), Concentrations of secondary species  $\text{SO}_4^{2-}$  (o),  $\text{NO}_3^-$  (p),  $\text{NH}_4^+$  (q), SOC (r), SIA (s), and SOA (t) of SA in k. The red and orange bars in (l-t) correspond to the days marked with the same colors in k. The error bars represent 1SD from three parallel Si isotope measurements in (b) and (l), the concentrations of  $\text{SO}_4^{2-}$  (o),  $\text{NO}_3^-$  (p),  $\text{NH}_4^+$  (q), daily variation of  $\text{NO}_x$  (m) and  $\text{SO}_2$  (n), and uncertainties of calculation on the concentrations of SOC (r), SIA (s), and SOA (t).

92 **3. Supporting tables**93 **Table S1. Concentrations of PM<sub>2.5</sub> and meteorological parameters in the sampling days.<sup>a</sup>**

| Date      | PM <sub>2.5</sub><br>( $\mu\text{g m}^{-3}$ ) <sup>b</sup> | $T_a$<br>( $^{\circ}\text{C}$ ) | RH<br>(%) | $P_{\text{vapor}}$<br>(hPa) | WS<br>( $\text{m s}^{-1}$ ) | WD<br>(Degree) | $P$<br>(hPa) | $T_g$<br>( $^{\circ}\text{C}$ ) | $R_{\text{total}}$<br>( $\text{W m}^{-2}$ ) | PAR<br>( $\mu\text{mol s}^{-1}\text{m}^2$ ) |
|-----------|------------------------------------------------------------|---------------------------------|-----------|-----------------------------|-----------------------------|----------------|--------------|---------------------------------|---------------------------------------------|---------------------------------------------|
| 6/1/2013  | 147.4 $\pm$ 24.5                                           | -4.4                            | 30.9      | 1.3                         | 1.0                         | 145.6          | 1020.3       | -4.3                            | 79.6                                        | 113.5                                       |
| 11/1/2013 | 195.1 $\pm$ 24.0                                           | -2.7                            | 55.8      | 2.7                         | 1.2                         | 276.9          | 1016.7       | -2.0                            | 57.5                                        | 81.7                                        |
| 18/1/2013 | 213.4 $\pm$ 15.3                                           | -2.0                            | 43.3      | 2.2                         | 0.8                         | 172.0          | 1019.9       | -0.9                            | 84.6                                        | 114.0                                       |
| 25/1/2013 | 82.6 $\pm$ 29.4                                            | -4.2                            | 32.5      | 1.5                         | 1.2                         | 93.0           | 1016.4       | -3.0                            | 89.6                                        | 120.7                                       |
| 29/1/2013 | 337.1 $\pm$ 9.9                                            | -2.3                            | 80.8      | 4.2                         | 0.9                         | 245.5          | 1017.9       | -0.1                            | 33.5                                        | 50.6                                        |
| 2/2/2013  | 98.3 $\pm$ 11.3                                            | -1.2                            | 32.2      | 1.8                         | 1.4                         | 126.4          | 1023.9       | 1.3                             | 109.4                                       | 146.2                                       |
| 8/2/2013  | 87.7 $\pm$ 7.7                                             | -6.9                            | 29.6      | 1.1                         | 1.6                         | 141.5          | 1028.1       | -4.8                            | 122.4                                       | 157.2                                       |
| 11/2/2013 | 83.6 $\pm$ 31.1                                            | -3.7                            | 34.4      | 1.7                         | 1.4                         | 132.8          | 1025.2       | -1.5                            | 66.5                                        | 98.6                                        |
| 23/2/2013 | 122.8 $\pm$ 8.0                                            | 4.0                             | 24.0      | 1.9                         | 0.8                         | 171.5          | 1020.0       | 9.2                             | 166.5                                       | 266.2                                       |
| 24/2/2013 | 135.4 $\pm$ 22.9                                           | 3.1                             | 33.2      | 2.5                         | 0.9                         | 177.7          | 1019.3       | 7.4                             | 102.3                                       | 165.6                                       |
| 27/2/2013 | 191.3 $\pm$ 15.8                                           | 7.4                             | 40.8      | 3.5                         | 1.6                         | 207.9          | 1009.4       | 12.3                            | 171.9                                       | 275.0                                       |
| 2/3/2013  | 53.4 $\pm$ 8.8                                             | 1.0                             | 21.5      | 1.4                         | 1.0                         | 125.3          | 1025.4       | 4.8                             | 76.5                                        | 138.9                                       |
| 5/3/2013  | 172.0 $\pm$ 6.8                                            | 8.2                             | 26.8      | 2.9                         | 0.8                         | 170.8          | 1009.4       | 13.1                            | 124.2                                       | 195.0                                       |
| 6/3/2013  | 208.8 $\pm$ 10.7                                           | 11.4                            | 35.9      | 4.5                         | 1.1                         | 161.1          | 1000.9       | 16.1                            | 141.2                                       | 226.2                                       |
| 7/3/2013  | 230.5 $\pm$ 7.3                                            | 11.9                            | 36.6      | 4.9                         | 1.4                         | 135.8          | 997.7        | 16.7                            | 134.3                                       | 211.4                                       |
| 10/3/2013 | 70.5 $\pm$ 4.5                                             | 7.0                             | 15.5      | 1.6                         | 2.4                         | 186.5          | 1018.7       | 11.6                            | 210.0                                       | 322.1                                       |
| 14/3/2013 | 138.2 $\pm$ 7.0                                            | 4.4                             | 50.4      | 4.1                         | 1.8                         | 189.8          | 1019.9       | 9.4                             | 161.6                                       | 217.3                                       |
| 15/3/2013 | 243.9 $\pm$ 2.9                                            | ND                              | ND        | ND                          | ND                          | ND             | ND           | ND                              | ND                                          | ND                                          |
| 26/3/2013 | 167.6 $\pm$ 5.4                                            | 8.0                             | 43.1      | 4.6                         | 1.2                         | 244.6          | 1006.0       | 13.3                            | 167.0                                       | 238.2                                       |

|           |           |      |      |      |     |       |        |      |       |       |
|-----------|-----------|------|------|------|-----|-------|--------|------|-------|-------|
| 31/3/2013 | 170.7±4.2 | 5.3  | 74.8 | 6.7  | 1.9 | 154.8 | 1011.6 | 9.3  | 33.1  | 55.2  |
| 2/4/2013  | 71.4±4.8  | 11.7 | 31.6 | 4.2  | 1.8 | 205.6 | 1010.0 | 17.4 | 225.5 | 334.7 |
| 12/4/2013 | 39.2±4.8  | 15.6 | 19.5 | 3.5  | 1.8 | 191.3 | 1005.3 | 21.7 | 231.6 | 355.1 |
| 21/4/2013 | 99.8±7.3  | 12.5 | 45.6 | 6.4  | 2.0 | 209.8 | 1010.7 | 18.3 | 226.7 | 328.7 |
| 22/4/2013 | 142.3±9.6 | 12.7 | 57.3 | 8.5  | 1.7 | 170.4 | 1006.6 | 17.5 | 111.7 | 171.1 |
| 6/5/2013  | 149.6±8.9 | ND   | ND   | ND   | ND  | ND    | ND     | ND   | ND    | ND    |
| 7/5/2013  | 148.5±8.4 | 24.3 | 39.4 | 11.7 | 1.1 | 199.6 | 986.5  | 29.0 | 173.7 | 261.5 |
| 17/5/2013 | 78.1±5.9  | 21.4 | 50.5 | 12.8 | 1.2 | 182.8 | 1004.2 | 25.2 | 124.4 | 196.8 |
| 18/5/2013 | 82.5±3.4  | 21.3 | 59.4 | 14.9 | 1.5 | 182.3 | 998.8  | 24.2 | 92.1  | 138.8 |
| 21/5/2013 | 69.6±11.7 | 23.4 | 35.8 | 10.3 | 1.2 | 158.0 | 991.9  | 27.3 | 193.8 | 298.3 |
| 23/5/2013 | 45.1±6.3  | 24.4 | 29.8 | 9.0  | 0.9 | 189.6 | 1002.8 | 29.0 | 211.1 | 325.0 |
| 3/6/2013  | 90.8±7.3  | 26.9 | 45.6 | 14.5 | 0.8 | 148.3 | 997.5  | 33.0 | 287.8 | 436.6 |
| 4/6/2013  | 95.0±3.6  | 21.4 | 67.8 | 17.1 | 1.2 | 122.3 | 1004.3 | 23.0 | 15.3  | 28.1  |
| 7/6/2013  | 107.2±1.3 | 20.2 | 85.3 | 20.2 | 0.6 | 132.8 | 1001.1 | 21.3 | 21.6  | 47.8  |
| 11/6/2013 | 61.5±2.5  | 21.2 | 60.4 | 14.9 | 1.1 | 181.1 | 1000.9 | 25.6 | 219.3 | 387.6 |
| 14/6/2013 | 92.3±7.0  | 27.4 | 33.9 | 12.3 | 1.4 | 177.3 | 1000.4 | 32.3 | 255.3 | 433.3 |
| 17/7/2013 | 41.3±4.5  | 28.1 | 47.3 | 17.2 | 1.0 | 147.2 | 997.7  | 34.1 | 271.6 | 480.1 |
| 26/7/2013 | 46.8±2.1  | 25.9 | 68.1 | 22.6 | 0.9 | 174.8 | 995.9  | 28.1 | 46.9  | 95.9  |
| 27/7/2013 | 91.2±3.8  | 25.3 | 80.5 | 26.0 | 0.4 | 73.5  | 993.4  | 28.1 | 50.2  | 100.2 |
| 18/8/2013 | 21.7±12.9 | 30.4 | 32.7 | 13.9 | 1.6 | 224.1 | 1000.6 | 35.0 | 282.6 | 496.8 |
| 22/8/2013 | 128.8±2.7 | 24.7 | 74.8 | 23.1 | 0.4 | 232.3 | 1001.5 | 25.5 | 46.2  | 86.8  |
| 26/8/2013 | 40.0±2.7  | 26.6 | 52.6 | 17.7 | 0.9 | 147.5 | 998.4  | 29.4 | 226.6 | 381.9 |
| 28/8/2013 | 69.7±7.2  | ND   | ND   | ND   | ND  | ND    | ND     | ND   | ND    | ND    |
| 1/9/2013  | 37.5±6.4  | ND   | ND   | ND   | ND  | ND    | ND     | ND   | ND    | ND    |

|            |            |      |      |      |     |       |        |      |       |       |
|------------|------------|------|------|------|-----|-------|--------|------|-------|-------|
| 9/9/2013   | 71.8±4.5   | ND   | ND   | ND   | ND  | ND    | ND     | ND   | ND    | ND    |
| 13/9/2013  | 66.2±3.4   | ND   | ND   | ND   | ND  | ND    | ND     | ND   | ND    | ND    |
| 29/9/2013  | 154.3±10.5 | 17.8 | 71.6 | 14.6 | 0.7 | 169.0 | 1003.0 | 18.2 | 22.1  | 37.3  |
| 4/10/2013  | 107.6±31.6 | 17.9 | 65.1 | 13.2 | 0.3 | 123.9 | 1006.8 | 20.1 | 135.3 | 193.3 |
| 12/10/2013 | 57.0±5.0   | 16.9 | 47.7 | 8.9  | 0.6 | 149.0 | 1010.8 | 18.6 | 114.5 | 170.6 |
| 16/10/2013 | 71.9±36.5  | 13.1 | 40.0 | 5.5  | 0.5 | 175.8 | 1018.0 | 15.2 | 162.8 | 216.4 |
| 17/10/2013 | 142.6±36.6 | 13.0 | 45.0 | 6.3  | 0.5 | 161.4 | 1018.3 | 14.7 | 141.1 | 186.4 |
| 26/10/2013 | 50.0±2.9   | 11.7 | 38.9 | 5.1  | 0.6 | 171.4 | 1015.0 | 12.9 | 126.0 | 161.4 |
| 2/11/2013  | 181.4±4.4  | 9.7  | 74.2 | 8.8  | 0.4 | 195.5 | 1014.6 | 11.0 | 77.0  | 101.8 |
| 5/11/2013  | 99.9±5.8   | 10.3 | 50.9 | 6.3  | 0.6 | 190.8 | 1013.0 | 11.3 | 54.8  | 77.1  |
| 7/11/2013  | 28.4±7.0   | 10.1 | 25.5 | 3.1  | 1.0 | 206.8 | 1013.4 | 10.4 | 100.3 | 136.0 |
| 8/11/2013  | 96.3±8.2   | 8.0  | 40.5 | 4.3  | 0.4 | 215.1 | 1012.8 | 8.8  | 70.1  | 90.8  |
| 11/11/2013 | 45.1±5.4   | 8.8  | 20.0 | 2.2  | 1.4 | 180.5 | 1020.8 | 9.5  | 85.8  | 122.0 |
| 13/11/2013 | 120.9±6.3  | 6.7  | 54.4 | 5.3  | 0.3 | 177.6 | 1013.5 | 7.6  | 45.2  | 60.9  |
| 22/11/2013 | 126.9±10.4 | 6.9  | 38.2 | 3.6  | 0.6 | 160.5 | 1016.7 | 7.1  | 60.1  | 82.6  |
| 30/11/2013 | 35.9±19.2  | 7.4  | 18.5 | 1.9  | 2.3 | 265.9 | 1015.2 | 7.9  | 83.6  | 101.4 |
| 1/12/2013  | 72.6±35.8  | 5.9  | 26.9 | 2.4  | 0.8 | 191.1 | 1015.4 | 6.5  | 75.6  | 90.5  |
| 6/12/2013  | 141.9±54.0 | 5.0  | 33.9 | 2.9  | 0.8 | 196.8 | 1012.0 | 5.9  | 65.2  | 79.6  |
| 7/12/2013  | 214.3±46.6 | 3.5  | 54.1 | 4.3  | 0.6 | 126.6 | 1012.3 | 4.2  | 50.9  | 60.7  |
| 22/12/2013 | 153.8±17.4 | -1.5 | 33.4 | 1.8  | 0.8 | 163.7 | 1024.5 | -0.8 | 59.2  | 103.2 |

<sup>a</sup> ND: no data was collected in this day.  $T_a$ : the daily average air temperature. RH: relative humidity.  $P_{\text{vapor}}$ : vapor pressure. WS: wind speed. WD: wind direction.  $P$ : atmospheric pressure.  $T_g$ : ground temperature.  $R_{\text{total}}$ : radiation. PAR: photosynthetically active radiation.

<sup>b</sup> Mean ± SD from 24 measurements in a day ( $n = 24$ ).

98 **Table S2. Concentrations of Si and chemical components indicative of secondary**  
99 **aerosols (NH<sub>4</sub><sup>+</sup>, NO<sub>3</sub><sup>-</sup>, SO<sub>4</sub><sup>2-</sup>, OC, and EC) in PM<sub>2.5</sub> samples in 2013.<sup>a</sup>**

| Date      | Si<br>(μg/m <sup>3</sup> ) <sup>b</sup> | SO <sub>4</sub> <sup>2-</sup><br>(μg/m <sup>3</sup> ) | NO <sub>3</sub> <sup>-</sup><br>(μg/m <sup>3</sup> ) | NH <sub>4</sub> <sup>+</sup><br>(μg/m <sup>3</sup> ) | OC<br>(μg/m <sup>3</sup> ) | EC<br>(μg/m <sup>3</sup> ) |
|-----------|-----------------------------------------|-------------------------------------------------------|------------------------------------------------------|------------------------------------------------------|----------------------------|----------------------------|
| 6/1/2013  | 0.90±0.05                               | 22.20±0.89                                            | 16.41±0.82                                           | 15.81±0.63                                           | 53.32±2.67                 | 10.30±0.51                 |
| 11/1/2013 | 2.09±0.01                               | 52.01±2.08                                            | 26.14±1.31                                           | 27.96±1.12                                           | 48.17±2.41                 | 8.64±0.43                  |
| 18/1/2013 | 0.64±0.02                               | 39.27±1.57                                            | 31.00±1.55                                           | 26.75±1.07                                           | 61.79±3.09                 | 16.61±0.83                 |
| 25/1/2013 | 1.03±0.02                               | 11.34±0.45                                            | 12.16±0.61                                           | 10.94±0.44                                           | 7.81±1.26                  | -                          |
| 29/1/2013 | 1.30±0.04                               | 112.87±4.51                                           | 69.30±3.47                                           | 62.01±2.48                                           | 39.70±1.99                 | 10.63±0.53                 |
| 2/2/2013  | 0.42±0.02                               | 13.81±0.55                                            | 15.81±0.79                                           | 13.37±0.53                                           | 30.40±1.52                 | 6.81±0.34                  |
| 8/2/2013  | 0.70±0.03                               | 30.69±1.23                                            | 7.56±0.38                                            | 6.59±0.26                                            | 18.49±0.92                 | 1.80±0.09                  |
| 11/2/2013 | 5.61±0.19                               | 31.45±1.26                                            | 6.79±0.34                                            | 6.22±0.25                                            | 23.95±1.20                 | 0.40±0.02                  |
| 23/2/2013 | 0.99±0.03                               | 43.09±1.72                                            | 16.83±0.84                                           | 13.11±0.52                                           | 27.24±1.36                 | 3.22±0.16                  |
| 24/2/2013 | 1.68±0.04                               | 34.33±1.37                                            | 28.19±1.41                                           | 24.69±0.99                                           | -                          | -                          |
| 27/2/2013 | 1.48±0.05                               | 53.59±2.14                                            | 30.76±1.54                                           | 23.57±0.94                                           | 40.57±2.03                 | 4.13±0.21                  |
| 2/3/2013  | 0.84±0.03                               | 15.88±0.64                                            | 5.46±0.27                                            | 3.69±0.15                                            | 17.44±0.87                 | 0.85±0.04                  |
| 5/3/2013  | 1.11±0.01                               | 16.28±0.65                                            | 47.42±2.37                                           | 25.53±1.02                                           | 38.70±1.94                 | 16.78±0.84                 |
| 6/3/2013  | 1.38±0.05                               | 30.27±1.21                                            | 64.44±3.22                                           | 32.22±1.29                                           | 37.54±1.88                 | 14.12±0.71                 |
| 7/3/2013  | 12.92±0.45                              | 33.92±1.36                                            | 68.69±3.43                                           | 34.65±1.39                                           | 41.69±2.08                 | 18.11±0.91                 |
| 10/3/2013 | 0.87±0.01                               | 9.62±0.38                                             | 14.59±0.73                                           | 11.55±0.46                                           | 16.78±0.84                 | 6.48±0.32                  |
| 14/3/2013 | 0.31±0.02                               | 30.91±1.24                                            | 37.69±1.88                                           | 24.32±0.97                                           | 19.93±1.00                 | 6.81±0.34                  |
| 15/3/2013 | 0.48±0.02                               | 57.06±2.28                                            | 79.64±3.98                                           | 45.59±1.82                                           | 22.43±1.12                 | 10.30±0.51                 |
| 26/3/2013 | 0.71±0.02                               | 45.55±1.82                                            | 48.63±2.43                                           | 29.79±1.19                                           | 17.11±0.86                 | 6.15±0.31                  |
| 31/3/2013 | 0.83±0.02                               | 56.52±2.26                                            | 42.55±2.13                                           | 31.61±1.26                                           | 14.62±0.73                 | 5.48±0.27                  |
| 2/4/2013  | 0.88±0.02                               | 21.91±0.88                                            | 9.26±0.46                                            | 14.58±0.58                                           | 13.14±0.66                 | 2.08±0.10                  |
| 12/4/2013 | 0.28±0.01                               | 4.39±0.18                                             | 6.02±0.30                                            | 3.53±0.14                                            | 10.89±0.54                 | 3.03±0.15                  |
| 21/4/2013 | 0.48±0.01                               | 22.03±0.88                                            | 32.01±1.60                                           | 14.89±0.60                                           | 14.11±0.71                 | 3.41±0.17                  |
| 22/4/2013 | 1.17±0.03                               | 35.63±1.43                                            | 45.61±2.28                                           | 22.55±0.90                                           | 16.86±0.84                 | 3.65±0.18                  |
| 6/5/2013  | 0.49±0.01                               | 48.02±1.92                                            | 28.49±1.42                                           | 25.04±1.00                                           | 21.59±1.08                 | 6.34±0.32                  |
| 7/5/2013  | 0.95±0.02                               | 47.85±1.91                                            | 23.58±1.18                                           | 25.22±1.01                                           | 23.63±1.18                 | 7.62±0.38                  |
| 17/5/2013 | 1.85±0.03                               | 18.42±0.74                                            | 21.77±1.09                                           | 12.05±0.48                                           | 12.07±0.60                 | 3.08±0.15                  |
| 18/5/2013 | 1.34±0.02                               | 25.90±1.04                                            | 18.50±0.93                                           | 13.08±0.52                                           | 10.65±0.53                 | 3.65±0.18                  |
| 21/5/2013 | 1.02±0.03                               | 18.76±0.75                                            | 8.78±0.44                                            | 7.31±0.29                                            | 19.03±0.95                 | 3.69±0.18                  |
| 23/5/2013 | 3.85±0.07                               | 11.10±0.44                                            | 6.02±0.30                                            | 4.73±0.19                                            | 12.41±0.62                 | 3.03±0.15                  |
| 3/6/2013  | 0.89±0.05                               | 25.99±1.04                                            | 12.99±0.65                                           | 14.46±0.58                                           | 18.23±0.91                 | 5.45±0.27                  |

|            |           |            |             |            |            |            |
|------------|-----------|------------|-------------|------------|------------|------------|
| 4/6/2013   | 1.62±0.05 | 23.84±0.95 | 21.77±1.09  | 17.30±0.69 | 14.02±0.70 | 5.21±0.26  |
| 7/6/2013   | 1.60±0.14 | 34.51±1.38 | 19.19±0.96  | 23.49±0.94 | 11.60±0.58 | 5.16±0.26  |
| 11/6/2013  | 0.66±0.03 | 14.68±0.59 | 15.19±0.76  | 5.99±0.24  | 13.33±0.67 | 2.70±0.14  |
| 14/6/2013  | 0.42±0.02 | 34.01±1.36 | 9.72±0.49   | 10.29±0.41 | 20.42±1.02 | 3.36±0.17  |
| 17/7/2013  | 0.78±0.04 | 7.49±0.30  | 3.60±0.18   | 3.24±0.13  | 12.17±0.61 | 1.91±0.10  |
| 26/7/2013  | 0.82±0.05 | 12.87±0.51 | 7.14±0.36   | 5.57±0.22  | 11.29±0.56 | 2.29±0.11  |
| 27/7/2013  | 1.44±0.02 | 21.09±0.84 | 23.23±1.16  | 13.51±0.54 | 16.78±0.84 | 3.25±0.16  |
| 18/8/2013  | 0.46±0.03 | 0.88±0.04  | 0.36±0.02   | 0.53±0.02  | 4.10±0.21  | 1.70±0.09  |
| 22/8/2013  | 0.26±0.01 | 20.34±0.81 | 11.43±0.57  | 12.39±0.50 | 17.80±0.89 | 10.10±0.51 |
| 26/8/2013  | 0.35±0.02 | 11.72±0.47 | 3.61±0.18   | 4.40±0.18  | 9.52±0.48  | 1.52±0.08  |
| 28/8/2013  | 0.48±0.02 | 17.47±0.70 | 15.92±0.80  | 10.44±0.42 | 13.85±0.69 | 1.48±0.07  |
| 1/9/2013   | 0.52±0.05 | 7.97±0.32  | 4.71±0.24   | 3.48±0.14  | 8.21±0.41  | 1.82±0.09  |
| 9/9/2013   | 1.01±0.04 | 27.85±1.11 | 12.16±0.61  | 11.21±0.45 | 9.87±0.49  | 1.20±0.06  |
| 13/9/2013  | 1.74±0.07 | 22.22±0.89 | 12.59±0.63  | 10.77±0.43 | 10.07±0.50 | 1.49±0.07  |
| 29/9/2013  | 0.89±0.02 | 44.85±1.79 | 38.65±1.93  | 21.69±0.87 | 24.58±1.23 | 3.13±0.16  |
| 4/10/2013  | 0.50±0.02 | 28.76±1.15 | 21.58±1.08  | 11.08±0.44 | -          | -          |
| 12/10/2013 | 2.30±0.09 | 9.05±0.36  | 10.17±0.51  | 4.07±0.16  | 12.93±0.65 | 2.64±0.13  |
| 16/10/2013 | 3.32±0.14 | 6.73±0.27  | 8.66±0.43   | 4.77±0.19  | 9.82±0.49  | 1.680±0.08 |
| 17/10/2013 | 0.48±0.01 | 54.13±2.17 | 27.74±1.39  | 24.45±0.98 | 15.48±0.77 | 3.16±0.16  |
| 26/10/2013 | 0.46±0.03 | 15.86±0.63 | 8.17±0.41   | 5.85±0.23  | 10.12±0.51 | 2.41±0.12  |
| 2/11/2013  | 0.72±0.02 | 49.28±1.97 | 48.17±2.41  | 27.83±1.11 | 25.18±1.26 | 6.93±0.35  |
| 5/11/2013  | 0.39±0.01 | 16.41±0.66 | 18.51±0.93  | 11.19±0.45 | 28.53±1.43 | 7.59±0.38  |
| 7/11/2013  | 1.54±0.08 | 5.39±0.22  | 3.03±0.15   | 2.13±0.09  | 10.77±0.54 | 1.26±0.06  |
| 8/11/2013  | 4.03±0.14 | 28.60±1.14 | 13.403±0.67 | 9.63±0.39  | 23.68±1.18 | 5.16±0.26  |
| 11/11/2013 | 0.41±0.01 | 12.43±0.50 | 3.70±0.19   | 2.19±0.09  | 9.42±0.47  | 1.36±0.07  |
| 13/11/2013 | 0.96±0.04 | 42.57±1.70 | 15.96±0.80  | 13.16±0.53 | 24.65±1.23 | 6.13±0.31  |
| 22/11/2013 | 1.86±0.09 | 42.59±1.70 | 19.21±0.96  | 11.56±0.46 | 27.83±1.39 | 5.80±0.29  |
| 30/11/2013 | 0.21±0.01 | 15.29±0.61 | 2.44±0.12   | 1.98±0.08  | 9.30±0.47  | 0.78±0.04  |
| 1/12/2013  | 1.23±0.06 | 24.42±0.98 | 6.41±0.32   | 4.70±0.19  | 20.74±1.04 | 3.55±0.18  |
| 6/12/2013  | 1.58±0.04 | 12.41±0.50 | 21.17±1.06  | 11.29±0.45 | 55.41±2.77 | 12.05±0.60 |
| 7/12/2013  | 3.35±0.09 | 39.42±1.58 | 35.78±1.79  | 26.14±1.05 | 62.07±3.10 | 12.78±0.64 |
| 22/12/2013 | 0.94±0.04 | 19.66±0.79 | 26.22±1.31  | 12.43±0.50 | 53.44±2.67 | 12.01±0.60 |

<sup>a</sup> In the measurement of secondary species, the uncertainties were 5%, 5%, 4%, 4%, and 5% for OC, EC, SO<sub>4</sub><sup>2-</sup>, NH<sub>4</sub><sup>+</sup>, and NO<sub>3</sub><sup>-</sup>, respectively. See the Sect. 1.3 and 1.5, Supplement.

<sup>b</sup> Mean ±SD from three parallel measurement by ICP-MS (*n* = 3).

#### 4. References for SI

- Cao, J. J., Lee, S. C., Ho, K. F., Zhang, X. Y., Zou, S. C., Fung, K., Chow, J. C., and Watson, J. G.: Characteristics of carbonaceous aerosol in Pearl River Delta Region, China during 2001 winter period, *Atmos. Environ.*, 37, 1451-1460, 10.1016/S1352-2310(02)01002-6, 2003.
- Castro, L. M., Pio, C. A., Harrison, R. M., and Smith, D. J. T.: Carbonaceous aerosol in urban and rural European atmospheres: estimation of secondary organic carbon concentrations, *Atmos. Environ.*, 33, 2771-2781, Doi 10.1016/S1352-2310(98)00331-8, 1999.
- Chow, J. C., Watson, J. G., Ashbaugh, L. L., and Magliano, K. L.: Similarities and differences in PM<sub>10</sub> chemical source profiles for geological dust from the San Joaquin Valley, California, *Atmos. Environ.*, 37, 1317-1340, 2003.
- Das, O., Wang, Y., and Hsieh, Y.-P.: Chemical and carbon isotopic characteristics of ash and smoke derived from burning of C<sub>3</sub> and C<sub>4</sub> grasses, *Org. Chem.*, 41, 263-269, 2010.
- Fraser, M. P., Cass, G. R., and Simoneit, B. R.: Gas-phase and particle-phase organic compounds emitted from motor vehicle traffic in a Los Angeles roadway tunnel, *Environ. Sci. Technol.*, 32, 2051-2060, 1998.
- Ge, S., Xu, X., Chow, J. C., Watson, J., Sheng, Q., Liu, W., Bai, Z., Zhu, T., and Zhang, J.: Emissions of air pollutants from household stoves: honeycomb coal versus coal cake, *Environ. Sci. Technol.*, 38, 4612-4618, 2004.
- He, K., Yang, F., Ma, Y., Zhang, Q., Yao, X., Chan, C. K., Cadle, S., Chan, T., and Mulawa, P.: The characteristics of PM<sub>2.5</sub> in Beijing, China, *Atmos. Environ.*, 35, 4959-4970, 2001.
- Hu, J., Zheng, M., Liu, W., Li, C., Nie, Z., Liu, G., Xiao, K., and Dong, S.: Occupational exposure to polychlorinated dibenzo-*p*-dioxins and dibenzofurans, dioxin-like polychlorinated biphenyls, and polychlorinated naphthalenes in workplaces of secondary nonferrous metallurgical facilities in China, *Environ. Sci. Technol.*, 47, 7773-7779, 10.1021/es4016475, 2013.
- Huang, R. J., Zhang, Y., Bozzetti, C., Ho, K. F., Cao, J. J., Han, Y., Daellenbach, K. R., Slowik, J. G., Platt, S. M., Canonaco, F., Zotter, P., Wolf, R., Pieber, S. M., Bruns, E. A., Crippa, M., Ciarelli, G., Piazzalunga, A., Schwikowski, M., Abbaszade, G., Schnelle-Kreis, J., Zimmermann, R., An, Z., Szidat, S., Baltensperger, U., El Haddad, I., and Prevot, A. S.: High secondary aerosol contribution to particulate pollution during haze events in China, *Nature*, 514, 218-222, 10.1038/nature13774, 2014.
- Li, H., Zhang, J., Zhao, Y., Wu, C.-Y., and Zheng, C.: Wettability of fly ashes from four coal-fired power plants in China, *Indus. Eng. Chem. Res.*, 50, 7763-7771, 10.1021/ie2001378,



2011.

Liu, J., Mauzerall, D. L., Chen, Q., Zhang, Q., Song, Y., Peng, W., Klimont, Z., Qiu, X., Zhang, S., Hu, M., Lin, W., Smith, K. R., and Zhu, T.: Air pollutant emissions from Chinese households: A major and underappreciated ambient pollution source, *Proc. Natl. Acad. Sci. U. S. A.*, 113, 7756-7761, 10.1073/pnas.1604537113, 2016.

Lu, D., Liu, Q., Zhang, T., Cai, Y., Yin, Y., and Jiang, G.: Stable silver isotope fractionation in the natural transformation process of silver nanoparticles, *Nat. Nanotechnol.*, 11, 682-686, 2016.

Lu, D., Liu, Q., Yu, M., Yang, X., Fu, Q., Zhang, X., Mu, Y., and Jiang, G.: Natural Silicon Isotopic Signatures Reveal the Sources of Airborne Fine Particulate Matter, *Environ. Sci. Technol.*, 52, 1088-1095, 2018.

Reff, A., Bhawe, P. V., Simon, H., Pace, T. G., Pouliot, G. A., Mobley, J. D., and Houyoux, M.: Emissions inventory of PM<sub>2.5</sub> trace elements across the United States, *Environ. Sci. Technol.*, 43, 5790-5796, 10.1021/es802930x, 2009.

Song, Y., Tang, X., Xie, S., Zhang, Y., Wei, Y., Zhang, M., Zeng, L., and Lu, S.: Source apportionment of PM<sub>2.5</sub> in Beijing in 2004, *J. Hazard. Mater.*, 146, 124-130, 2007.

Tan, J. H., Duan, J. C., Chen, D. H., Wang, X. H., Guo, S. J., Bi, X. H., Sheng, G. Y., He, K. B., and Fu, J. M.: Chemical characteristics of haze during summer and winter in Guangzhou, *Atmos. Res.*, 94, 238-245, 10.1016/j.atmosres.2009.05.016, 2009a.

Tan, J. H., Duan, J. C., He, K. B., Ma, Y. L., Duan, F. K., Chen, Y., and Fu, J. M.: Chemical characteristics of PM<sub>2.5</sub> during a typical haze episode in Guangzhou, *J. Environ. Sci.*, 21, 774-781, 10.1016/S1001-0742(08)62340-2, 2009b.

Turpin, B. J., and Huntzicker, J. J.: Identification of Secondary Organic Aerosol Episodes and Quantitation of Primary and Secondary Organic Aerosol Concentrations during Scaqs, *Atmos. Environ.*, 29, 3527-3544, Doi 10.1016/1352-2310(94)00276-Q, 1995.

Viana, M., Chi, X., Maenhaut, W., Cafmeyer, J., Querol, X., Alastuey, A., Mikuska, P., and Večeřa, Z.: Influence of sampling artefacts on measured PM, OC and EC levels in carbonaceous aerosols in an urban area, *Aerosol Sci. Technol.*, 40, 107-117, 10.1080/02786820500484388, 2006.

Xing, L., Fu, T. M., Cao, J. J., Lee, S. C., Wang, G. H., Ho, K. F., Cheng, M. C., You, C. F., and Wang, T. J.: Seasonal and spatial variability of the OM/OC mass ratios and high regional correlation between oxalic acid and zinc in Chinese urban organic aerosols, *Atmos. Chem. Phys.*, 13, 4307-4318, 10.5194/acp-13-4307-2013, 2013.

Zambardi, T., and Poitrasson, F.: Precise determination of silicon isotopes in silicate rock

170 reference materials by MC-ICP-MS, *Geostand. Geoanal. Res.*, 35, 89-99,  
171 10.1111/j.1751-908X.2010.00067.x, 2011.

172 Zhang, R., Jing, J., Tao, J., Hsu, S.-C., Wang, G., Cao, J., Lee, C. S. L., Zhu, L., Chen, Z., and  
173 Zhao, Y.: Chemical characterization and source apportionment of PM<sub>2.5</sub> in Beijing: seasonal  
174 perspective, *Atmos. Chem. Phys.*, 13, 7053-7074, 2013.

175 Zhao, P., Feng, Y., Zhu, T., and Wu, J.: Characterizations of resuspended dust in six cities of  
176 North China, *Atmos. Environ.*, 40, 5807-5814, 2006.

177
